# Supplementary material for: Integrated Care for Frail Elderly: A Qualitative Study of a Promising Approach in The Netherlands
Source: PubMed Central journal article supplement (PMC6729107; doi:10.5334/ijic.4626), 2019-09-03
Supplement: ijic-19-3-4626-s1.pdf [file ijic-19-3-4626-s1.pdf]

## (6)Appendix

### A.1: Interview partner overview

| Reference in text                                    | Stakeholder description                              |
|------------------------------------------------------|------------------------------------------------------|
| PM_1                                                 | Programme manager/ Initiator                         |
| PM_2                                                 | Programme manager                                    |
| PM_3                                                 | Programme manager                                    |
| IN_1                                                 | Initiator                                            |
| IN_2                                                 | Initiator/ Other stakeholder                         |
| HI_1                                                 | Representative of the sponsor/payer (Health insurer) |
| HI_2                                                 | Representative of the sponsor/payer (Health insurer) |
| MS_1                                                 | Non-physician medical staff                          |
| MS_2                                                 | Non-physician medical staff                          |
| IC_1                                                 | Informal caregiver                                   |
| FE_1                                                 | Patient (Frail Elderly)                              |
| <i>Refused participation due to time constraints</i> | Physician                                            |
| <i>Refused participation due to time constraints</i> | Representative of the sponsor/payer (Health insurer) |
