# Supplementary material for: Integrated Care for Frail Elderly: A Qualitative Study of a Promising Approach in The Netherlands
Source: PubMed Central journal article supplement (PMC6729107; doi:10.5334/ijic.4626), 2019-09-03
Supplement: ijic-19-3-4626-s2.pdf [file ijic-19-3-4626-s2.pdf]

## (6)Appendix

### A.2: Thematic focus areas for interviews

| Stakeholder |                                                                                                  | Task                                                                                                                                    | T2                                                    | T3                                                                           | T4                                         | T5                      | T6                                   | T7                                    | T8*        | TS**                          |
|-------------|--------------------------------------------------------------------------------------------------|-----------------------------------------------------------------------------------------------------------------------------------------|-------------------------------------------------------|------------------------------------------------------------------------------|--------------------------------------------|-------------------------|--------------------------------------|---------------------------------------|------------|-------------------------------|
|             |                                                                                                  |                                                                                                                                         | Implementation process and barriers to implementation | Design of delivery of care including relationships between partners involved | Partnerships beyond the health care system | Use of ICT applications | Use of self-management interventions | Involvement of new professional roles | Evaluation | Financing and payment schemes |
| A.          | Manager(s)                                                                                       |                                                                                                                                         | X                                                     | XX                                                                           | XX                                         | X                       | XX                                   | XX                                    | X          | X                             |
| B.          | Initiator(s)                                                                                     |                                                                                                                                         | XX                                                    | XX                                                                           | X                                          | o                       | X                                    | XX                                    | X          | X                             |
| C.          | Representative(s) of sponsor/payer organisations                                                 |                                                                                                                                         | XX                                                    | o                                                                            | X                                          | o                       | o                                    | o                                     | X          | XX                            |
| D1.         | Physician(s)                                                                                     |                                                                                                                                         | o                                                     | XX                                                                           | XX                                         | X                       | X                                    | X                                     | X          | X                             |
| D2.         | Non-physician medical staff (e.g. nurses), social staff, new professional groups (if applicable) |                                                                                                                                         | o                                                     | XX                                                                           | XX                                         | XX                      | XX                                   | XX                                    | X          | X                             |
| E.          | Informal caregiver(s)                                                                            |                                                                                                                                         | o                                                     | XX                                                                           | XX                                         | XX                      | XX                                   | o                                     | o          | o                             |
| F.          | Client(s) or their representative(s)                                                             |                                                                                                                                         | o                                                     | XX                                                                           | XX                                         | XX                      | XX                                   | XX                                    | o          | o                             |
| G.          | (Other stakeholder(s))                                                                           | <i>Interview protocol to be developed only if necessary and based on protocols of the stakeholder types closest to this stakeholder</i> |                                                       |                                                                              |                                            |                         |                                      |                                       |            |                               |

**Note:** XX = main question; X = to be asked only if not mentioned in the answers to main questions; o = not necessary to be asked

\* results of T8 mostly derived from document analysis; in the interviews, we want to know about the experience with evaluation/monitoring

\*\* results of TS partly derived from document and literature analysis
