# Supplementary material for: Integrated Care for Frail Elderly: A Qualitative Study of a Promising Approach in The Netherlands
Source: PubMed Central journal article supplement (PMC6729107; doi:10.5334/ijic.4626), 2019-09-03

**(6)Appendix**

**A.3: The SELFIE Framework for Integrated Care for Multi-Morbidity**

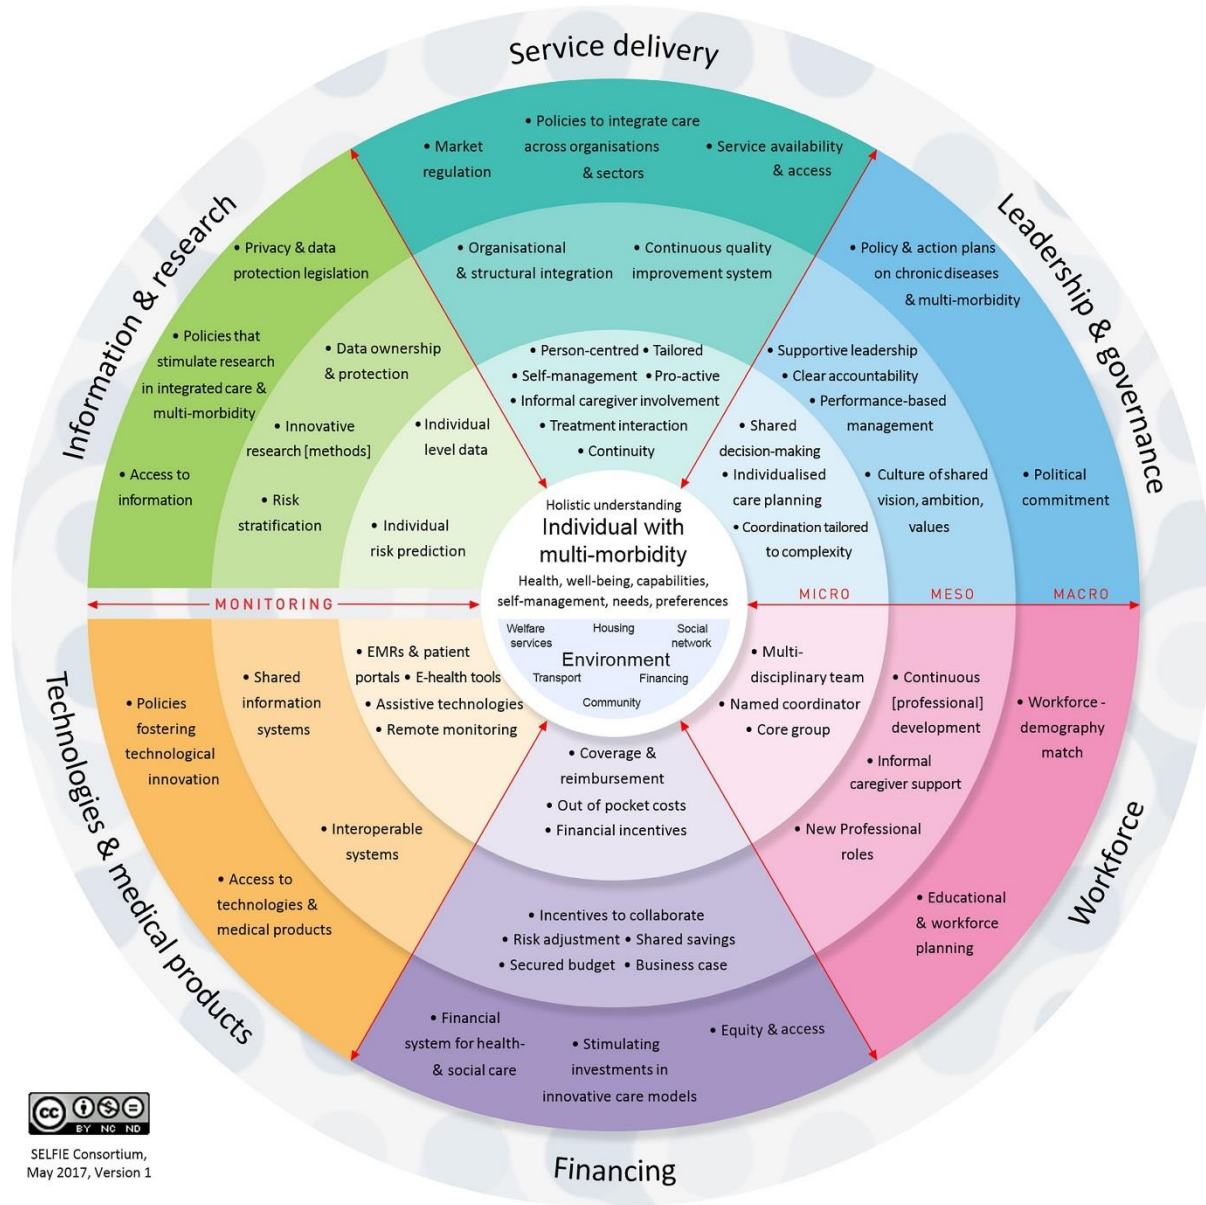

Supplement: ijic-19-3-4626-s3.pdf [file ijic-19-3-4626-s3.pdf]
